# Supplementary material for: High-throughput microfluidic spheroid technology for early detection of colistin-induced nephrotoxicity with gradient-based analysis
Source: Royal Society of Chemistry journal article supplement (doi:10.1039/d4lc00782d), 2024-12-10
Supplement: d4lc00782d1.pdf [file d4lc00782d1.pdf]

## Supporting Information

# High-Throughput Microfluidic Spheroid Technology for Early Detection of Colistin-Induced Nephrotoxicity with Gradient-Based Analysis

Yugyeong Lee,<sup>a†</sup> Yunsang Choi,<sup>b†</sup> Ju Lan Chun,<sup>c</sup> Hong Bin Kim,<sup>b,d</sup> Sejoong Kim,<sup>b,d\*</sup> Eu Suk Kim<sup>b,d\*</sup> and Sungsu Park<sup>a,e,f\*</sup>

- a. Department of Biomedical Engineering, Sungkyunkwan University (SKKU), Suwon, 16419, Korea.
- b. Department of Internal Medicine, Seoul National University Bundang Hospital, Seongnam, 13620, Korea.
- c. National Institute of Animal Science, Rural Development Administration, Wanjugun, Jeollabukdo, 55365, Korea.
- d. Department of Internal Medicine, Seoul National University College of Medicine, Seoul, 03080, Korea.
- e. School of Mechanical Engineering, SKKU, Suwon, 16419, Korea.
- f. Department of Biophysics, Institute of Quantum Biophysics (IQB), SKKU, Suwon, 16419, Korea.

† Yugyeong Lee, Yunsang Choi contributed equally as first authors.

\* *Corresponding authors*

**Sejoong Kim** - Department of Internal Medicine, Seoul National University Bundang Hospital 82, Gumi-ro 173 Beon-gil, Bundang-gu, Seongnam, Gyeonggi-do, Korea / E-mail: sejoong2@snu.ac.kr/ Tel: +82-31-787-7051 (<https://orcid.org/0000-0002-7238-9962>),

**Eu Suk Kim** - Department of Internal Medicine, Seoul National University Bundang Hospital 82, Gumi-ro 173 Beon-gil, Bundang-gu, Seongnam, Gyeonggi-do, Korea/ E-mail: [eskim@snuh.org](mailto:eskim@snuh.org)/ Tel: +82-31-787-7062, Fax: +82-31-787-4052 (<https://orcid.org/0000-0001-7132-0157>)

**Sungsu Park** - School of Mechanical Engineering & Department of Biophysics, Institute of Quantum Biophysics, Sungkyunkwan University (SKKU), 2066 Seobu-ro, Jangan-gu, Suwon 16419 Korea /E-mail: nanopark@skku.edu/Tel: +82-31-290-7431/Fax: +82-31-290-5889 (<https://orcid.org/0000-0003-3062-1302>)

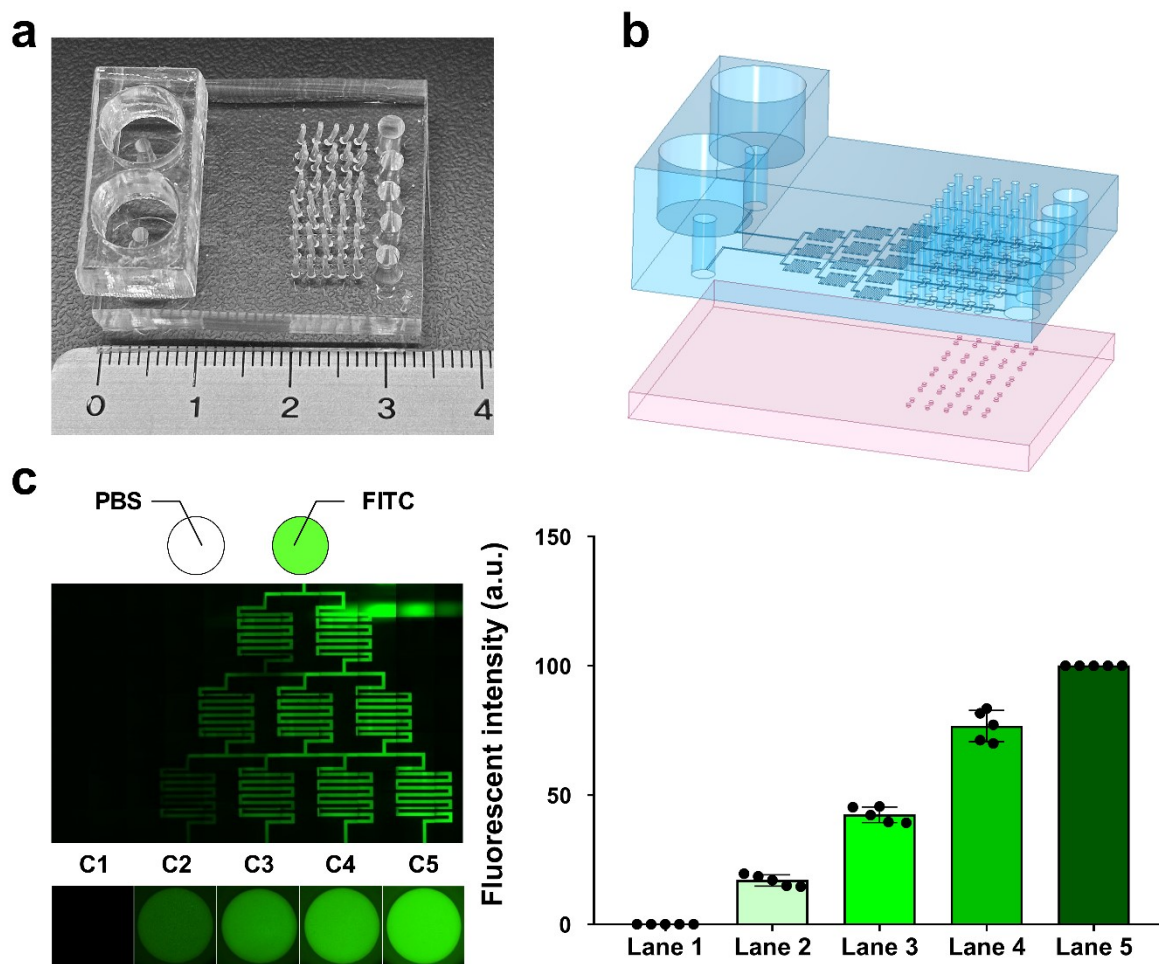

**Figure S1.** Design of spheroid nephrotoxicity assessing platform (SNAP). (a) View of the SNAP. (b) Schematic showing two layers in the SNAP. (c) Concentration gradient of fluorescein isothiocyanate (FITC) in the SNAP.

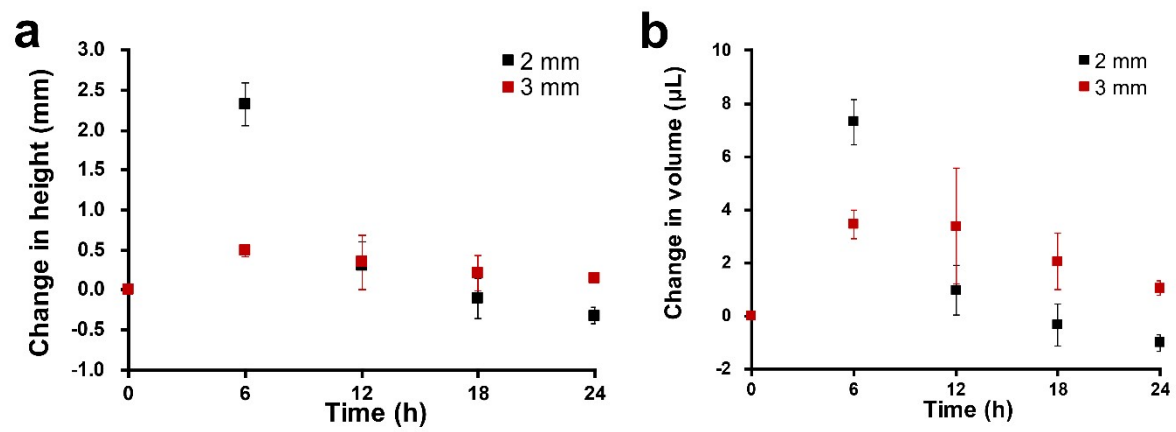

**Figure S2.** Comparison of flow rate in SNAP depending on the outlet size. Change of (a) liquid height and (b) liquid volume in outlet after introducing liquid into the inlets.

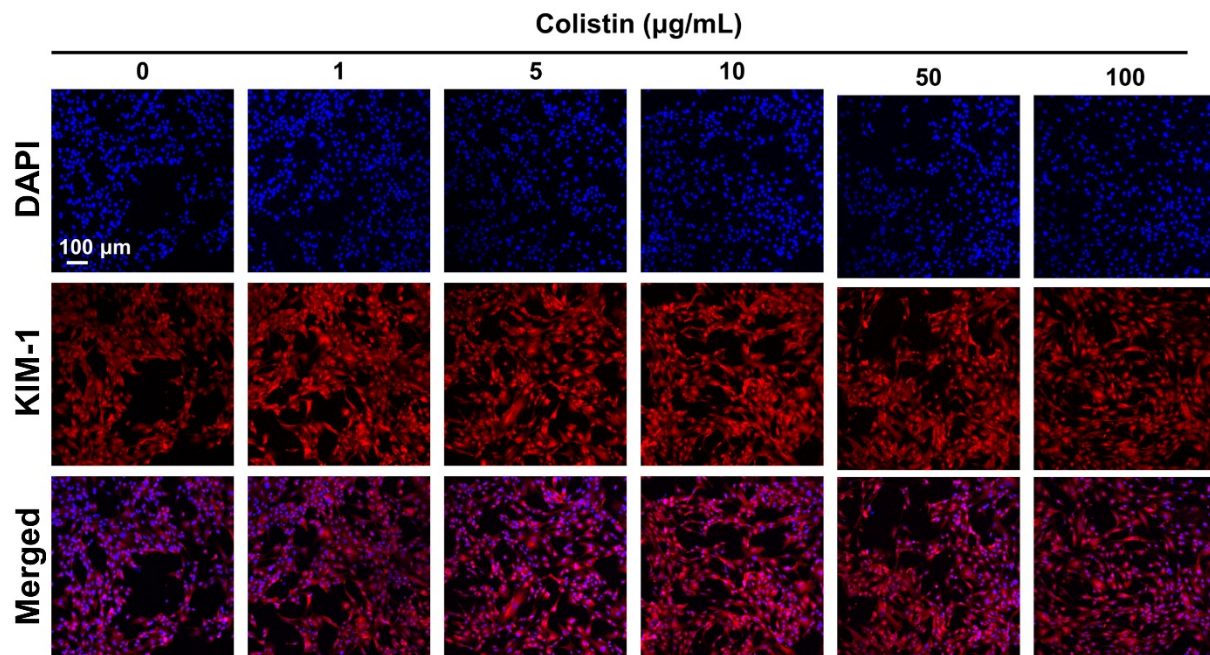

**Figure S3.** Kidney injury marker -1 (KIM-1) expression after treating colistin on renal proximal tubular epithelial cells (RPTECs) in 2D culture.

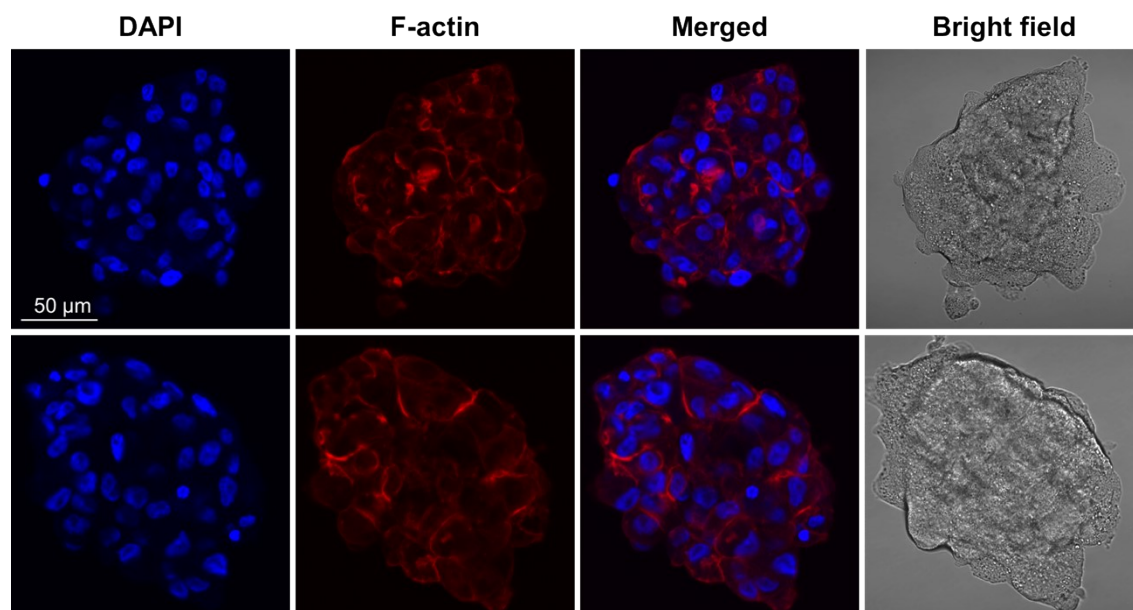

**Figure S4.** Expression of Filamentous actin (F-actin) from RPTEC spheroid. The spheroids were collected, fixed, and permeabilized following the procedures described in the main text. Acti-stain™ 555 fluorescent phalloidin (Cytoskeleton, Inc.) was used to stain F-actin according to the manufacturer's instructions. DNA was stained using 4',6-diamidino-2-phenylindole (DAPI) (Sigma-Aldrich).

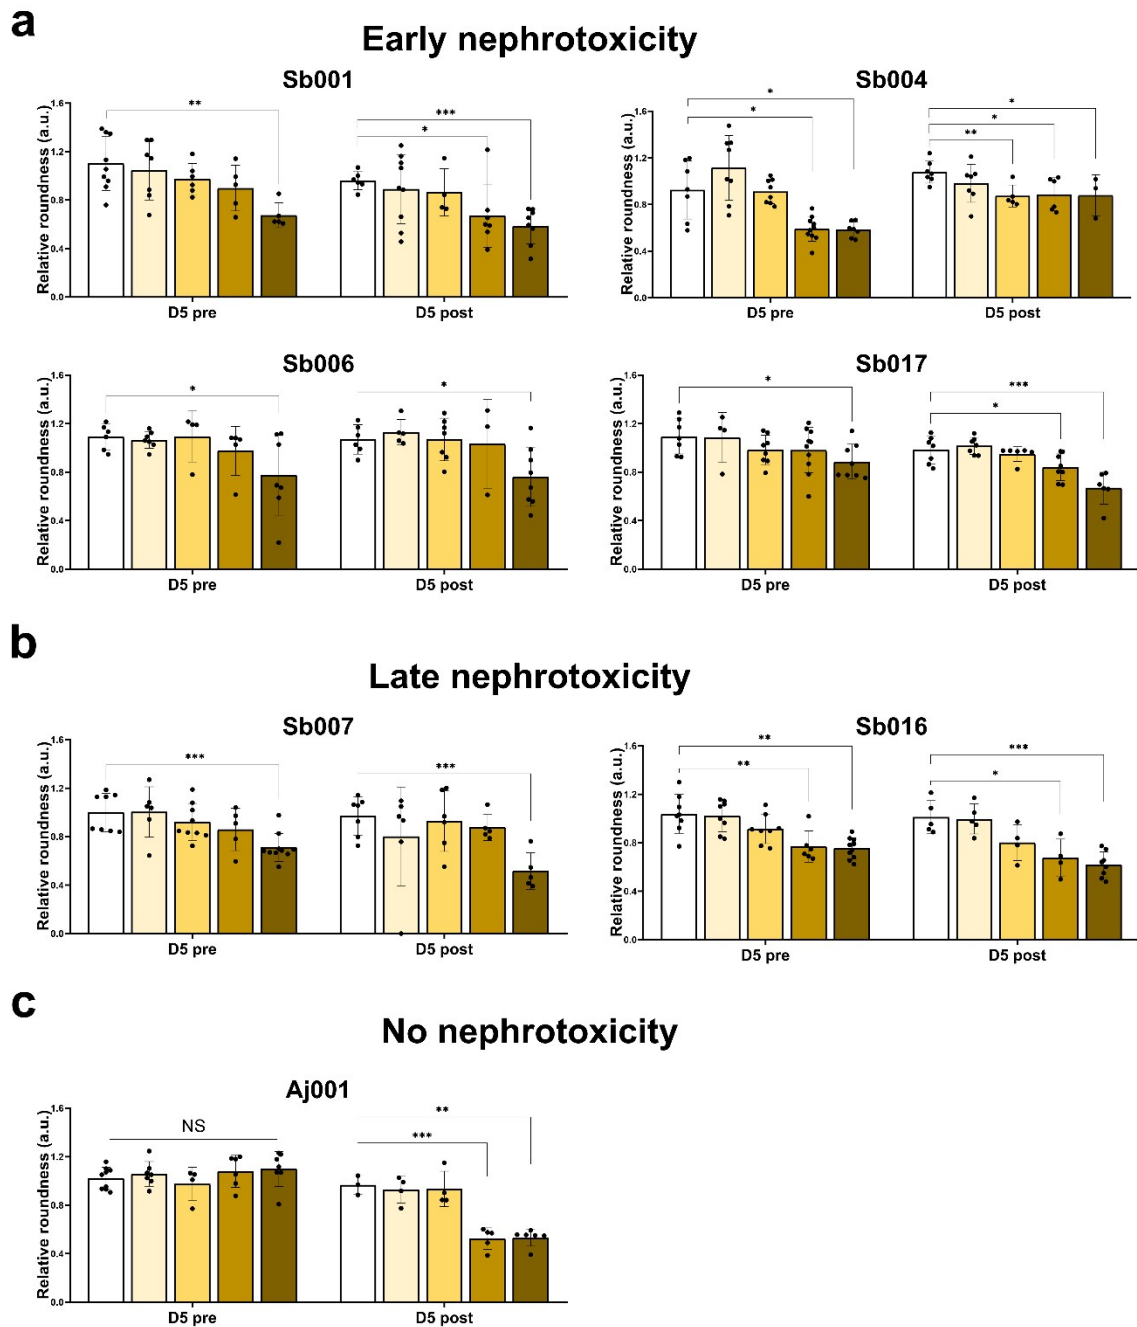

**Figure S5.** Nephrotoxicity in microfluidic after treating plasma from colistin-administered patients. Change in roundness of RPTEC spheroid after treating plasma from (a) patient showed early nephrotoxicity, (b) patient showed late nephrotoxicity, or (c) patient did not show nephrotoxicity ( $n > 3$ , Student's t-test: NS  $P > 0.05$ , \*  $P < 0.05$ , \*  $P < 0.01$ , \*\*\*  $P < 0.001$ ).

| Patient | Age / Sex | Underlying disease                                                   | Primary site of infection             | Causative microorganism | Duration of colistin treatment (Day) | In-hospital mortality | Colistin level (µg/mL) |       | AKI Observed point (Day of colistin administration) |                               | Additional nephrotoxic drug |
|---------|-----------|----------------------------------------------------------------------|---------------------------------------|-------------------------|--------------------------------------|-----------------------|------------------------|-------|-----------------------------------------------------|-------------------------------|-----------------------------|
|         |           |                                                                      |                                       |                         |                                      |                       | pre                    | Post  |                                                     |                               |                             |
| Sb001   | 78/M      | Hypertension, solid cancer                                           | Respiratory tract                     | CRAB                    | 11                                   | Yes                   | 4.81                   | 6.57  | D5                                                  | Plasma collection day         | Diuretics                   |
| Sb004   | 92/M      | Hematologic disease                                                  | Respiratory tract                     | CRAB                    | 5                                    | Yes                   | 5.04                   | 9.17  | D5                                                  |                               | (-)                         |
| Sb005   | 86/F      | Hypertension, cardiovascular disease                                 | CRBSI                                 | CRE                     | 14                                   | No                    | 5.51                   | 15.36 | D5                                                  |                               | (-)                         |
| Sb006   | 58/F      | Diabetes mellitus, solid cancer                                      | Hepatobiliary tract                   | CRPA, CRE               | 17                                   | No                    | 1.35                   | 6.13  | D5                                                  |                               | Diuretics                   |
| Sb017   | 45/M      | Lung disease, cardiovascular disease, hematologic disease            | Primary bacteremia                    | CRPA                    | 15                                   | No                    | 4.13                   | 10.79 | D6                                                  |                               | Tacrolimus                  |
| Sb007   | 76/M      | Solid cancer, hematologic disease                                    | Complicated intra-abdominal infection | CRE                     | 9                                    | No                    | 1.16                   | 7.78  | D11                                                 | 5 day after plasma collection | (-)                         |
| Sb008   | 73/M      | Hypertension, diabetes mellitus, cardiovascular disease              | Respiratory tract                     | CRPA                    | 14                                   | No                    | 3.73                   | 10.23 | D9                                                  | 4 day after plasma collection | (-)                         |
| Sb016   | 51/M      | Diabetes mellitus, kidney disease, solid cancer, hematologic disease | Genitourinary tract, CRBSI            | CRPA                    | 8                                    | No                    | 3.93                   | 7.39  | D12                                                 | 6 day after plasma collection | Acyclovir                   |
| Sb015   | 71/M      | Diabetes mellitus, liver disease, solid cancer                       | Hepatobiliary tract                   | CRE                     | 14                                   | No                    | 3.95                   | 6.23  | (-)                                                 |                               | (-)                         |
| Aj001   | 47/F      | Lung disease, cardiovascular disease                                 | Respiratory tract                     | CRAB                    | 9                                    | No                    | 3.08                   | 3.36  | (-)                                                 |                               | Diuretics                   |

**Table S1.** Patient characteristics from which plasma used in SNAP analysis was obtained

Abbreviations: CRBSI, catheter related bloodstream infection; CRAB, carbapenem-resistant *Acinetobacter baumannii*; CRE, carbapenem-resistant Enterobacteriaceae; CRPA, carbapenem-resistant *Pseudomonas aeruginosa*; AKI, acute kidney injury.
